# Supplementary material for: Kinetic Modeling of Brain [18-F]FDG Positron Emission Tomography Time Activity Curves with Input Function Recovery (IR) Method
Source: MDPI journal article supplement (doi:10.3390/metabo14020114), 2024-02-08
Supplement: s1 [file s1]

## SUPPLEMENTAL MATERIALS AND METHODS

At the core of the input recovery method lies the non-linear optimization (lsqnonlin, MATLAB) of the objective function (Supp. Eq.2), which has as input

- 1) a vector  $p$  with 9 parameters (7 parameters of the Feng sub-function (Supp. Eq.1), and  $p(8)$  and  $p(9)$  weights for the constraint %5 and %6)
- 2)  $fit\_data$  (the structure with all fixed and updated parameters, such as tail samples and performance parameters, explained in detail below)

While the optimization is ongoing, inside the objective function, the  $y$  data (fitted recovered input) is calculated for every iteration until convergence.

Supp. Eq. 1 (Feng Input):

$$(p(2)*(t - p(1)) - p(3) - p(4)) * \exp(p(5)*(t - p(1))) + p(3) * \exp(p(6)*(t - p(1))) + p(4) * \exp(p(7)*(t - p(1)))$$

Supp Eq. 2 (pseudo code of the objective function to be minimized at each iteration):

*Objective\_function*=

$$\begin{aligned} & [fit\_data.weight1.*((fit\_data.latesamples\_y - y(p,fit\_data,t))./fit\_data.latesamples\_standarddev); \%1 \\ & fit\_data.weight2.*((fit\_data.parameters\_average - p(1:7))./fit\_data.parameters\_standarddev); \%2 \\ & fit\_data.weight3.*(((m1\_intercept + m1\_r.*p(5)./p(2))) - max\_peak)); \%3 \\ & fit\_data.weight4.*(((m2\_intercept + m3\_r.*vss) - p(2)))); \%4 \\ & p(8).*(((m3\_intercept + m3\_r.*dose) - AUC\_2\_to\_4\_min)); \%5 \\ & p(9).*(MRT\_fitted\_curve\_5\_to\_100\_min - MRT\_original\_curve\_5\_to\_100\_min)]; \%6 \end{aligned}$$

$y()$  is the function that produces the recovered fitted curve with parameters  $p$  (Feng function), the

$fit\_data$  (structure) and  $t$  the time column. In  $fit\_data$  the used fields by the objective function are:

weights1-4 that have been optimized and fixed during training.

latesamples\_y: the list of the activity concentration of the late samples

latesamples\_standarddev: the standard deviation of the activity concentration of the late samples

parameters\_average: the average of the parameters of Feng input before the fitting (fixed by training)

parameters\_std: the standard deviation of the parameters of Feng input before the fitting (fixed by training)

m1\_intercept and m1\_r: refer to the regression of Step 4a1 in the manuscript

m2\_intercept and m2\_r: refer to the regression of Step 4a2 in the manuscript

m3\_intercept and m3\_r: refer to the regression of Step 4a3 in the manuscript

max\_peak: maximal activity at the peak

vss: volume of distribution at steady state (see Eq.5 in the main text)

dose: injected dose in MBq

*AUC\_2\_to\_4\_min = is recalculated at each iteration*

*MRT\_fitted\_curve\_5\_to\_100\_min = mean retention time of the tail is recalculated at each iteration*
