# Supplementary material for: Kinetic Modeling of Brain [18-F]FDG Positron Emission Tomography Time Activity Curves with Input Function Recovery (IR) Method
Source: MDPI journal article supplement (doi:10.3390/metabo14020114), 2024-02-08
Supplement: s1 [file s1]

Table S1. General Table by Dataset

|                                        | Reference set (N=13) | Train set (N=56) | Test set (N=20) | Total (N=89)  | p value |
|----------------------------------------|----------------------|------------------|-----------------|---------------|---------|
| <b>Scan type (Early/Late)</b>          |                      |                  |                 |               | < 0.001 |
| Early                                  | 13 (100.0%)          | 56 (100.0%)      | 0 (0.0%)        | 69 (77.5%)    |         |
| Late                                   | 0 (0.0%)             | 0 (0.0%)         | 20 (100.0%)     | 20 (22.5%)    |         |
| <b>Original_Input_Type</b>             |                      |                  |                 |               | < 0.001 |
| Arterial                               | 11 (84.6%)           | 0 (0.0%)         | 0 (0.0%)        | 11 (12.4%)    |         |
| Arterialized                           | 2 (15.4%)            | 56 (100.0%)      | 7 (35.0%)       | 65 (73.0%)    |         |
| Peak from Image - aortic arch          | 0 (0.0%)             | 0 (0.0%)         | 12 (60.0%)      | 12 (13.5%)    |         |
| Peak from Image - LV                   | 0 (0.0%)             | 0 (0.0%)         | 1 (5.0%)        | 1 (1.1%)      |         |
| <b>Input quality (Good/Poor)</b>       |                      |                  |                 |               | < 0.001 |
| Poor quality                           | 0 (0.0%)             | 56 (100.0%)      | 20 (100.0%)     | 76 (85.4%)    |         |
| Good quality                           | 13 (100.0%)          | 0 (0.0%)         | 0 (0.0%)        | 13 (14.6%)    |         |
| <b>Gender</b>                          |                      |                  |                 |               | 0.540   |
| f                                      | 11 (84.6%)           | 48 (85.7%)       | 15 (75.0%)      | 74 (83.1%)    |         |
| m                                      | 2 (15.4%)            | 8 (14.3%)        | 5 (25.0%)       | 15 (16.9%)    |         |
| <b>Age</b>                             |                      |                  |                 |               | 0.615   |
| Mean (SD)                              | 48.4 (12.0)          | 46.3 (9.5)       | 44.7 (11.7)     | 46.2 (10.3)   |         |
| Range                                  | 31.6 - 66.0          | 23.2 - 62.0      | 20.5 - 69.0     | 20.5 - 69.0   |         |
| <b>BMI</b>                             |                      |                  |                 |               | < 0.001 |
| Mean (SD)                              | 25.7 (5.2)           | 33.8 (7.9)       | 26.9 (6.0)      | 31.1 (8.0)    |         |
| Range                                  | 20.1 - 39.9          | 20.3 - 50.9      | 19.6 - 41.0     | 19.6 - 50.9   |         |
| <b>Dose</b>                            |                      |                  |                 |               | < 0.001 |
| Mean (SD)                              | 250.8 (33.2)         | 186.5 (10.4)     | 191.7 (25.8)    | 197.1 (29.4)  |         |
| Range                                  | 187.0 - 289.0        | 147.0 - 214.0    | 149.0 - 237.0   | 147.0 - 289.0 |         |
| <b>Max SUV (Original)</b>              |                      |                  |                 |               | < 0.001 |
| Mean (SD)                              | 25.0 (6.1)           | 10.6 (4.5)       | 11.8 (3.0)      | 13.0 (6.7)    |         |
| Range                                  | 19.1 - 40.0          | 3.5 - 18.4       | 7.7 - 17.7      | 3.5 - 40.0    |         |
| <b>Max SUV (IR (recovered))</b>        |                      |                  |                 |               | 0.190   |
| Mean (SD)                              | 24.7 (4.6)           | 26.3 (5.4)       | 23.9 (4.8)      | 25.5 (5.2)    |         |
| Range                                  | 18.8 - 35.2          | 15.4 - 39.9      | 17.6 - 33.4     | 15.4 - 39.9   |         |
| <b>Max SUV (Original-IR perc diff)</b> |                      |                  |                 |               | < 0.001 |
| Mean (SD)                              | 0.9 (16.5)           | 193.5 (128.9)    | 111.4 (48.8)    | 146.9 (125.5) |         |
| Range                                  | -19.9 - 36.8         | 44.6 - 549.0     | 14.1 - 198.1    | -19.9 - 549.0 |         |
| <b>AUC SUV (Original)</b>              |                      |                  |                 |               | 0.025   |
| Mean (SD)                              | 146.2 (69.2)         | 176.1 (70.4)     | 130.8 (50.1)    | 161.6 (68.4)  |         |
| Range                                  | 89.6 - 316.4         | 75.6 - 338.4     | 74.0 - 253.4    | 74.0 - 338.4  |         |
| <b>AUC SUV (IR (recovered))</b>        |                      |                  |                 |               | 0.018   |
| Mean (SD)                              | 147.8 (67.6)         | 184.8 (71.6)     | 139.2 (50.7)    | 169.2 (69.3)  |         |
| Range                                  | 90.0 - 313.4         | 82.2 - 346.3     | 83.2 - 254.1    | 82.2 - 346.3  |         |
| <b>AUC SUV (Original-IR perc diff)</b> |                      |                  |                 |               | 0.003   |
| Mean (SD)                              | 1.6 (2.6)            | 5.6 (4.1)        | 7.2 (6.4)       | 5.3 (4.8)     |         |
| Range                                  | -2.5 - 6.8           | -2.6 - 13.2      | -0.8 - 24.9     | -2.6 - 24.9   |         |
| <b>MRT SUV (Original)</b>              |                      |                  |                 |               | 0.001   |
| Mean (SD)                              | 20.3 (4.6)           | 26.0 (5.3)       | 22.9 (5.3)      | 24.5 (5.6)    |         |

|                                        | Reference set (N=13) | Train set (N=56) | Test set (N=20) | Total (N=89) | p value |
|----------------------------------------|----------------------|------------------|-----------------|--------------|---------|
| Range                                  | 15.2 - 29.2          | 15.6 - 42.2      | 15.0 - 33.6     | 15.0 - 42.2  | 0.003   |
| <b>MRT SUV (IR (recovered))</b>        |                      |                  |                 |              |         |
| Mean (SD)                              | 19.8 (5.0)           | 24.5 (5.4)       | 20.7 (5.3)      | 22.9 (5.6)   |         |
| Range                                  | 14.7 - 29.2          | 15.0 - 37.7      | 13.2 - 31.5     | 13.2 - 37.7  | 0.003   |
| <b>MRT SUV (Original-IR perc diff)</b> |                      |                  |                 |              |         |
| Mean (SD)                              | -3.1 (3.1)           | -6.1 (5.2)       | -9.7 (6.9)      | -6.5 (5.7)   |         |
| Range                                  | -9.0 - 1.5           | -24.0 - 1.2      | -25.3 - 0.5     | -25.3 - 1.5  |         |

Table S2. General Table by Input Quality

|                                        | Poor quality (N=76) | Good quality (N=13) | Total (N=89)  | p value |
|----------------------------------------|---------------------|---------------------|---------------|---------|
| <b>Set type</b>                        |                     |                     |               | < 0.001 |
| Reference set                          | 0 (0.0%)            | 13 (100.0%)         | 13 (14.6%)    |         |
| Train set                              | 56 (73.7%)          | 0 (0.0%)            | 56 (62.9%)    |         |
| Test set                               | 20 (26.3%)          | 0 (0.0%)            | 20 (22.5%)    |         |
| <b>Scan type (Early/Late)</b>          |                     |                     |               | 0.036   |
| Early                                  | 56 (73.7%)          | 13 (100.0%)         | 69 (77.5%)    |         |
| Late                                   | 20 (26.3%)          | 0 (0.0%)            | 20 (22.5%)    |         |
| <b>Original__Input__Type</b>           |                     |                     |               | < 0.001 |
| Arterial                               | 0 (0.0%)            | 11 (84.6%)          | 11 (12.4%)    |         |
| Arterialized                           | 63 (82.9%)          | 2 (15.4%)           | 65 (73.0%)    |         |
| Peak from Image - aortic arch          | 12 (15.8%)          | 0 (0.0%)            | 12 (13.5%)    |         |
| Peak from Image - LV                   | 1 (1.3%)            | 0 (0.0%)            | 1 (1.1%)      |         |
| <b>Gender</b>                          |                     |                     |               | 0.878   |
| f                                      | 63 (82.9%)          | 11 (84.6%)          | 74 (83.1%)    |         |
| m                                      | 13 (17.1%)          | 2 (15.4%)           | 15 (16.9%)    |         |
| <b>Age</b>                             |                     |                     |               | 0.420   |
| Mean (SD)                              | 45.8 (10.0)         | 48.4 (12.0)         | 46.2 (10.3)   |         |
| Range                                  | 20.5 - 69.0         | 31.6 - 66.0         | 20.5 - 69.0   |         |
| <b>BMI</b>                             |                     |                     |               | 0.008   |
| Mean (SD)                              | 32.0 (8.0)          | 25.7 (5.2)          | 31.1 (8.0)    |         |
| Range                                  | 19.6 - 50.9         | 20.1 - 39.9         | 19.6 - 50.9   |         |
| <b>Dose</b>                            |                     |                     |               | < 0.001 |
| Mean (SD)                              | 187.9 (15.9)        | 250.8 (33.2)        | 197.1 (29.4)  |         |
| Range                                  | 147.0 - 237.0       | 187.0 - 289.0       | 147.0 - 289.0 |         |
| <b>Max SUV (Original)</b>              |                     |                     |               | < 0.001 |
| Mean (SD)                              | 10.9 (4.1)          | 25.0 (6.1)          | 13.0 (6.7)    |         |
| Range                                  | 3.5 - 18.4          | 19.1 - 40.0         | 3.5 - 40.0    |         |
| <b>Max SUV (IR (recovered))</b>        |                     |                     |               | 0.557   |
| Mean (SD)                              | 25.6 (5.4)          | 24.7 (4.6)          | 25.5 (5.2)    |         |
| Range                                  | 15.4 - 39.9         | 18.8 - 35.2         | 15.4 - 39.9   |         |
| <b>Max SUV (Original-IR perc diff)</b> |                     |                     |               | < 0.001 |
| Mean (SD)                              | 171.9 (118.8)       | 0.9 (16.5)          | 146.9 (125.5) |         |
| Range                                  | 14.1 - 549.0        | -19.9 - 36.8        | -19.9 - 549.0 |         |
| <b>AUC SUV (Original)</b>              |                     |                     |               | 0.385   |
| Mean (SD)                              | 164.2 (68.3)        | 146.2 (69.2)        | 161.6 (68.4)  |         |
| Range                                  | 74.0 - 338.4        | 89.6 - 316.4        | 74.0 - 338.4  |         |
| <b>AUC SUV (IR (recovered))</b>        |                     |                     |               | 0.232   |
| Mean (SD)                              | 172.8 (69.4)        | 147.8 (67.6)        | 169.2 (69.3)  |         |
| Range                                  | 82.2 - 346.3        | 90.0 - 313.4        | 82.2 - 346.3  |         |
| <b>AUC SUV (Original-IR perc diff)</b> |                     |                     |               | 0.002   |
| Mean (SD)                              | 6.0 (4.8)           | 1.6 (2.6)           | 5.3 (4.8)     |         |
| Range                                  | -2.6 - 24.9         | -2.5 - 6.8          | -2.6 - 24.9   |         |
| <b>MRT SUV (Original)</b>              |                     |                     |               | 0.003   |

|                                        | Poor quality (N=76) | Good quality (N=13) | Total (N=89) | p value |
|----------------------------------------|---------------------|---------------------|--------------|---------|
| Mean (SD)                              | 25.2 (5.5)          | 20.3 (4.6)          | 24.5 (5.6)   |         |
| Range                                  | 15.0 - 42.2         | 15.2 - 29.2         | 15.0 - 42.2  |         |
| <b>MRT SUV (IR (recovered))</b>        |                     |                     |              | 0.029   |
| Mean (SD)                              | 23.5 (5.6)          | 19.8 (5.0)          | 22.9 (5.6)   |         |
| Range                                  | 13.2 - 37.7         | 14.7 - 29.2         | 13.2 - 37.7  |         |
| <b>MRT SUV (Original-IR perc diff)</b> |                     |                     |              | 0.019   |
| Mean (SD)                              | -7.1 (5.8)          | -3.1 (3.1)          | -6.5 (5.7)   |         |
| Range                                  | -25.3 - 1.2         | -9.0 - 1.5          | -25.3 - 1.5  |         |

Table S3. General Table by Input/Peak Origin

|                                        | Arterial (N=11) | Arterialized (N=65) | Peak from Image - aortic arch<br>(N=12) | Peak from Image - LV<br>(N=1) | Total (N=89)  | p value |
|----------------------------------------|-----------------|---------------------|-----------------------------------------|-------------------------------|---------------|---------|
| <b>Set type</b>                        |                 |                     |                                         |                               |               | < 0.001 |
| Reference set                          | 11 (100.0%)     | 2 (3.1%)            | 0 (0.0%)                                | 0 (0.0%)                      | 13 (14.6%)    |         |
| Train set                              | 0 (0.0%)        | 56 (86.2%)          | 0 (0.0%)                                | 0 (0.0%)                      | 56 (62.9%)    |         |
| Test set                               | 0 (0.0%)        | 7 (10.8%)           | 12 (100.0%)                             | 1 (100.0%)                    | 20 (22.5%)    |         |
| <b>Scan type (Early/Late)</b>          |                 |                     |                                         |                               |               | < 0.001 |
| Early                                  | 11 (100.0%)     | 58 (89.2%)          | 0 (0.0%)                                | 0 (0.0%)                      | 69 (77.5%)    |         |
| Late                                   | 0 (0.0%)        | 7 (10.8%)           | 12 (100.0%)                             | 1 (100.0%)                    | 20 (22.5%)    |         |
| <b>Input quality (Good/Poor)</b>       |                 |                     |                                         |                               |               | < 0.001 |
| Poor quality                           | 0 (0.0%)        | 63 (96.9%)          | 12 (100.0%)                             | 1 (100.0%)                    | 76 (85.4%)    |         |
| Good quality                           | 11 (100.0%)     | 2 (3.1%)            | 0 (0.0%)                                | 0 (0.0%)                      | 13 (14.6%)    |         |
| <b>Gender</b>                          |                 |                     |                                         |                               |               | 0.041   |
| f                                      | 9 (81.8%)       | 57 (87.7%)          | 8 (66.7%)                               | 0 (0.0%)                      | 74 (83.1%)    |         |
| m                                      | 2 (18.2%)       | 8 (12.3%)           | 4 (33.3%)                               | 1 (100.0%)                    | 15 (16.9%)    |         |
| <b>Age</b>                             |                 |                     |                                         |                               |               | 0.012   |
| Mean (SD)                              | 48.5 (11.9)     | 46.7 (9.3)          | 39.6 (11.0)                             | 69.0 (NA)                     | 46.2 (10.3)   |         |
| Range                                  | 31.6 - 66.0     | 23.2 - 62.0         | 20.5 - 54.8                             | 69.0 - 69.0                   | 20.5 - 69.0   |         |
| <b>BMI</b>                             |                 |                     |                                         |                               |               | < 0.001 |
| Mean (SD)                              | 24.1 (2.9)      | 33.7 (7.6)          | 23.8 (3.5)                              | 23.6 (NA)                     | 31.1 (8.0)    |         |
| Range                                  | 20.1 - 29.0     | 20.3 - 50.9         | 19.6 - 32.1                             | 23.6 - 23.6                   | 19.6 - 50.9   |         |
| <b>Dose</b>                            |                 |                     |                                         |                               |               | < 0.001 |
| Mean (SD)                              | 261.8 (21.3)    | 190.4 (15.0)        | 177.9 (11.7)                            | 149.0 (NA)                    | 197.1 (29.4)  |         |
| Range                                  | 232.0 - 289.0   | 147.0 - 237.0       | 159.0 - 200.0                           | 149.0 - 149.0                 | 147.0 - 289.0 |         |
| <b>Max SUV (Original)</b>              |                 |                     |                                         |                               |               | < 0.001 |
| Mean (SD)                              | 23.3 (4.2)      | 11.3 (6.0)          | 12.9 (3.2)                              | 10.9 (NA)                     | 13.0 (6.7)    |         |
| Range                                  | 19.1 - 31.0     | 3.5 - 40.0          | 8.1 - 17.7                              | 10.9 - 10.9                   | 3.5 - 40.0    |         |
| <b>Max SUV (IR (recovered))</b>        |                 |                     |                                         |                               |               | 0.496   |
| Mean (SD)                              | 23.9 (3.7)      | 26.0 (5.3)          | 24.4 (5.9)                              | 23.1 (NA)                     | 25.5 (5.2)    |         |
| Range                                  | 18.8 - 28.6     | 15.4 - 39.9         | 17.6 - 33.4                             | 23.1 - 23.1                   | 15.4 - 39.9   |         |
| <b>Max SUV (Original-IR perc diff)</b> |                 |                     |                                         |                               |               | < 0.001 |
| Mean (SD)                              | 4.0 (16.0)      | 181.1 (126.3)       | 95.5 (50.3)                             | 110.8 (NA)                    | 146.9 (125.5) |         |
| Range                                  | -16.5 - 36.8    | -19.9 - 549.0       | 14.1 - 198.1                            | 110.8 - 110.8                 | -19.9 - 549.0 |         |
| <b>AUC SUV (Original)</b>              |                 |                     |                                         |                               |               | 0.010   |
| Mean (SD)                              | 126.2 (46.5)    | 175.9 (70.2)        | 123.1 (46.4)                            | 84.6 (NA)                     | 161.6 (68.4)  |         |
| Range                                  | 89.6 - 252.1    | 75.6 - 338.4        | 74.0 - 220.7                            | 84.6 - 84.6                   | 74.0 - 338.4  |         |
| <b>AUC SUV (IR (recovered))</b>        |                 |                     |                                         |                               |               | 0.009   |

|                                            | Arterial (N=11) | Arterialized (N=65) | Peak from Image - aortic arch<br>(N=12) | Peak from Image - LV<br>(N=1) | Total (N=89) | p value    |
|--------------------------------------------|-----------------|---------------------|-----------------------------------------|-------------------------------|--------------|------------|
| Mean (SD)                                  | 128.5 (46.0)    | 183.9 (70.8)        | 132.7 (49.8)                            | 95.8 (NA)                     | 169.2 (69.3) |            |
| Range                                      | 90.0 - 251.3    | 82.2 - 346.3        | 83.2 - 236.9                            | 95.8 - 95.8                   | 82.2 - 346.3 |            |
| <b>AUC SUV (Original-IR perc<br/>diff)</b> |                 |                     |                                         |                               |              | 0.004      |
| Mean (SD)                                  | 2.0 (2.6)       | 5.2 (4.1)           | 8.3 (7.4)                               | 13.2 (NA)                     | 5.3 (4.8)    |            |
| Range                                      | -2.5 - 6.8      | -2.6 - 13.2         | -0.8 - 24.9                             | 13.2 - 13.2                   | -2.6 - 24.9  |            |
| <b>MRT SUV (Original)</b>                  |                 |                     |                                         |                               |              | <<br>0.001 |
| Mean (SD)                                  | 19.1 (3.8)      | 25.9 (5.1)          | 21.7 (6.0)                              | 24.8 (NA)                     | 24.5 (5.6)   |            |
| Range                                      | 15.2 - 29.2     | 15.6 - 42.2         | 15.0 - 33.6                             | 24.8 - 24.8                   | 15.0 - 42.2  |            |
| <b>MRT SUV (IR (recovered))</b>            |                 |                     |                                         |                               |              | <<br>0.001 |
| Mean (SD)                                  | 18.4 (3.9)      | 24.4 (5.2)          | 19.4 (5.7)                              | 18.5 (NA)                     | 22.9 (5.6)   |            |
| Range                                      | 14.7 - 29.0     | 15.0 - 37.7         | 13.2 - 31.5                             | 18.5 - 18.5                   | 13.2 - 37.7  |            |
| <b>MRT SUV (Original-IR perc<br/>diff)</b> |                 |                     |                                         |                               |              | <<br>0.001 |
| Mean (SD)                                  | -3.9 (2.7)      | -5.9 (5.1)          | -10.4 (6.7)                             | -25.3 (NA)                    | -6.5 (5.7)   |            |
| Range                                      | -9.0 - 0.2      | -24.0 - 1.5         | -23.5 - 0.5                             | -25.3 - -25.3                 | -25.3 - 1.5  |            |
